# Supplementary material
Source: MDPI journal article supplement (https://www.mdpi.com/2073-4441/15/23/4061)
Supplement: s1 [file s1]

**Supplementary information**

**Ecotoxicity Assessment of the Water Extracts from  
Metal-Contaminated and Hydrocarbon-Contaminated  
Soils**

Qian Li<sup>1</sup>, Juan Yin<sup>1</sup>, Lingling Wu<sup>1,2,\*</sup>, Rongbing Fu<sup>1</sup>, Ling Chen<sup>1,3</sup>

<sup>1</sup> *College of Environmental Science and Engineering, Tongji University, Shanghai 200092, China*

<sup>2</sup> *Key Laboratory of Yangtze River Water Environment, Ministry of Education, Shanghai 200092, China*

<sup>3</sup> *Shanghai Institute of Pollution Control and Ecological Security, Shanghai 200092, China*

\* Corresponding [wulingling@tongji.edu.cn](mailto:wulingling@tongji.edu.cn)

**Table S1 Ecotoxicological tests of the soils**

| Contact                     | Organism                                  | Endpoint of the measurement                                             | Standard bioassay          | References |
|-----------------------------|-------------------------------------------|-------------------------------------------------------------------------|----------------------------|------------|
| Direct contact (whole soil) | <i>Avena sativa</i> L.                    | Growth                                                                  | ISO/DIS 15799, 1999        | [1]        |
|                             | <i>Brassica rapa</i> L.                   | Growth                                                                  | ISO/DIS 15799, 1999        |            |
|                             | <i>Eisenia fetida</i>                     | Mortality                                                               | OECD 207, 1984             |            |
|                             | <i>Eisenia fetida</i>                     | Avoidance behavior                                                      | ISO/DIS 17512-1, 2008      |            |
|                             | Folsomia candida                          | Mortality and reproduction                                              | OECD, 2009                 | [2]        |
|                             |                                           | Chronic toxicity tests                                                  | ISO, 2014                  | [3]        |
|                             | Radish ( <i>Raphanus lativus</i> L.)      | Germination                                                             | ASTM, 2014                 | [4]        |
|                             | <i>Vibrio fischeri</i> (Microtox)         | Bioluminescence inhibition                                              | Environmental, 1998        | [5]        |
|                             | <i>Brassica juncea</i>                    | Seed germination and growth                                             | OECD, 2006                 |            |
|                             | <i>Escherichia coli</i>                   | SOS-Induction Factor                                                    | SOS-Chromotest kit         |            |
|                             | <i>Vibrio fischeri</i> (Microtox)         | Bioluminescence inhibition                                              | -                          | [6]        |
|                             | Wheat ( <i>Triticum aestivum</i> L.)      | 14-day root elongation                                                  | -                          | [7]        |
|                             | Rape ( <i>Brassica napus</i> L.)          | Seed germination rate, seedling growth in 7-day seed germination tests. | -                          | [8]        |
|                             | Cucumber ( <i>Cucumis Sativus</i> L.)     |                                                                         |                            |            |
|                             | Garden pea ( <i>Pisum sativum</i> )       | Root nodulation and leghaemoglobin assay                                | -                          | [9]        |
|                             | <i>Eisenia fetida</i>                     | Acute, chronic and genotoxicity assays                                  | OECD, 1984, 2004           |            |
|                             | Wheat ( <i>Triticum aestivum</i> )        | 5 d-shoot and root elongation assays and 14 d-shoot biomass measurement | ISO 11269-1; 11269-2, 2012 | [10]       |
|                             | Sorghum ( <i>Sorghum bicolor</i> )        |                                                                         |                            |            |
|                             | Tomato ( <i>Lycopersicon esculentum</i> ) |                                                                         |                            |            |
|                             | Lettuce ( <i>Lactuca sativa</i> )         |                                                                         |                            |            |
|                             | Garden cress ( <i>Lepidium sativum</i> )  |                                                                         |                            |            |
|                             | White mustard ( <i>Sinapis alba</i> )     |                                                                         |                            |            |
|                             | <i>Lactuca sativa</i>                     | Germination and growth                                                  | ISO, 2005                  | [11]       |

|                                          |                                                       |                                                          |                                              |                                                                                                                                                         |
|------------------------------------------|-------------------------------------------------------|----------------------------------------------------------|----------------------------------------------|---------------------------------------------------------------------------------------------------------------------------------------------------------|
|                                          |                                                       | inhibition (14 d)                                        |                                              |                                                                                                                                                         |
|                                          | <i>Eisebua fetida</i>                                 | Survival (14 d)                                          | ISO, 1993                                    |                                                                                                                                                         |
|                                          | <i>Folsomia candida</i>                               | Avoidance (20 min)                                       | Not standardized                             |                                                                                                                                                         |
|                                          | <i>Folsomia candida</i>                               | Reproduction (40 d)                                      | ISO, 1999                                    |                                                                                                                                                         |
| Indirect contact<br>(Soil-water extract) | <i>Avena sativa</i> L.                                | Germination index (GI)                                   | Fuentes et al., 2004; Alvarenga et al., 2012 | DIN 38414-S4 (1984).[1]                                                                                                                                 |
|                                          | <i>Brassica rapa</i> L.                               | GI (%)= [RSG×RRG]/100                                    |                                              |                                                                                                                                                         |
|                                          | <i>Lepidium sativum</i> L.                            |                                                          |                                              |                                                                                                                                                         |
|                                          | <i>Vibrio fischeri</i>                                | Bioluminescence inhibition                               | ISO 11348-2, 1998                            |                                                                                                                                                         |
|                                          | <i>Daphnia magna</i>                                  | Immobilization/mortality                                 | ISO 6341, 1996                               |                                                                                                                                                         |
|                                          | <i>Vibrio fischeri</i> (Microtox)                     | Bioluminescence inhibition                               | EN 12457-2 protocol, EC 2002.                | Liquid-to-solid ratio of 100 g/L [2]                                                                                                                    |
|                                          | <i>Vibrio fischeri</i> (Microtox)                     | Bioluminescence inhibition                               | -                                            | The leaching solution comprised a 7.0 g soil sample mixed with 21 mL NaCl solution 2 % (w/v) heated to 50 °C and centrifuged at 160 rpm for 90 min. [5] |
|                                          | <i>Vibrio fischeri</i> (Microtox)                     | Bioluminescence inhibition                               | Microbics Corporation, 1995.                 | Soil elutriates were obtained after mixing 15 g of soil and 30 g Milli Q water for 24 h. [6]                                                            |
|                                          | <i>Luctuca sativa</i> L.                              | Germination, root and shoot elongation and fresh biomass | Filter paper test. OECD 208, 2006.           | Solid-to-water ratio of 1:10 (m/V) according to DIN 38414-S4 (1984). [12]                                                                               |
|                                          | <i>Avena sativa</i> L.                                |                                                          |                                              |                                                                                                                                                         |
|                                          | Microalgae ( <i>Pseudokirchneriella subcapitata</i> ) | Growth inhibition                                        | OECD 201, 1984.                              |                                                                                                                                                         |
|                                          | Microcrustacean ( <i>Daphnia magna</i> )              | Immobilization                                           | ISO 6341, 1996.                              |                                                                                                                                                         |
|                                          | <i>Azomonas agilis</i>                                | Dehydrogenase activity                                   | Hungarian standard (HS 21978-30)             | For soil extraction 40 g of the soil sample was suspended in 80 ml deionised water. [13]                                                                |
|                                          | Mustard seeds <i>Sinapis alba</i>                     | Length of germinated root and shoot                      | Hungarian standard (HS 21978-8)              |                                                                                                                                                         |

|  |                                                   |                                                  |                   |                                                                                                                                                                           |
|--|---------------------------------------------------|--------------------------------------------------|-------------------|---------------------------------------------------------------------------------------------------------------------------------------------------------------------------|
|  | <i>Panagrellus redivivus</i>                      | Reproduction inhibition                          | -                 |                                                                                                                                                                           |
|  | <i>Tetrahymena pyriformis</i>                     | Reproduction inhibition                          | -                 |                                                                                                                                                                           |
|  | Mustard seeds <i>Sinapis alba</i>                 | Root and shoot elongation                        | -                 |                                                                                                                                                                           |
|  | Chlorococcal algae <i>Desmodesmus subspicatus</i> | Growth inhibition                                | ISO 8692, 2004    | Czech legislation for characterization of waste and contaminated soils. Solid-to-water ratio of 1:10 (m/V) according to DIN 38414-S4 (1984). [14]                         |
|  | <i>Brassica chinensis</i>                         | Seed germination and root elongation             | Wong et al., 2001 | Sludge extracts were prepared by shaking 2 g fresh sewage sludge with 20 ml of milli-Q water. [15]                                                                        |
|  | <i>Vibrio fischeri</i>                            | Luminescence inhibition (30 min)                 | ISO 1998a, 1998b  | [11]                                                                                                                                                                      |
|  | Micro-crustaceans <i>Daphnia magna</i>            | Immobilization (48 h)                            | ISO, 1996         |                                                                                                                                                                           |
|  | Algae <i>Pseudokirchneriella subcapitata</i>      | Growth inhibition (72 h)                         | ISO, 2004         |                                                                                                                                                                           |
|  | Rotifers <i>Brachionus calyciflorus</i>           | Growth inhibition (48 h)                         | ISO 2008a, 2008b  |                                                                                                                                                                           |
|  | Animals Mouse lymphoma cells                      | Chromosomic change (24 h)                        | Not standardized  |                                                                                                                                                                           |
|  | Zebrafish larvae                                  | Developmental neurotoxicity                      | -                 | The village soil leachate composed of 100 mL deionized water and 100 g village soil sample (1 g/mL) was shaken at 145 rpm on a thermostatic oscillator at 28°C (3d). [16] |
|  | Zebrafish embryos                                 | Developmental toxicity and thyroid hormone assay | -                 | 100 g of village soil samples was added 100 mL of ultrapure water (1 g/mL). [17]                                                                                          |
|  | Zebrafish embryos                                 | Developmental toxicity                           | -                 | [18]                                                                                                                                                                      |

|  |                                     |                                     |   |                                                                                                                                  |
|--|-------------------------------------|-------------------------------------|---|----------------------------------------------------------------------------------------------------------------------------------|
|  | Hepatocellular carcinoma HepG2 cell | Cancer cell metastasis              | - | Following filtration with a 100-mesh sieve, a 100 g sample was added to a sealed beaker with 100 mL double-distilled water. [19] |
|  | <i>Vibrio fischeri</i>              | Bioluminescence inhibition          | - | DIN 38414-S4 [20]                                                                                                                |
|  | <i>Lactuca sativa</i>               | Germination; Root elongation        | - |                                                                                                                                  |
|  | <i>Raphanus sativus</i>             | Germination; Root elongation        | - |                                                                                                                                  |
|  | <i>Dictyostelium discoideum</i>     | Mortality; Endocytosis; Replication | - |                                                                                                                                  |

## Reference

- Alvarenga, P.; Palma, P.; de Varennes, A.; Cunha-Queda, A.C. A contribution towards the risk assessment of soils from the São Domingos Mine (Portugal): Chemical, microbial and ecotoxicological indicators. *Environ. Pollut.* **2012**, *161*, 50-56.
- Kołtowski, M.; Charmsa, B.; Skubiszewska-Zięba, J.; Oleszczuk, P. Effect of biochar activation by different methods on toxicity of soil contaminated by industrial activity. *Ecotox. Environ. Safe.* **2017**, *136*, 119-125.
- Lin, X.L.; Sun, Z.J.; Zhao, L.; Ma, J.; Li, X.; He, F.; Hou, H. Toxicity of exogenous hexavalent chromium to soil-dwelling springtail *Folsomia candida* in relation to soil properties and aging time. *Chemosphere* **2019**, *224*, 734-742.
- Yavuz, B.; Januszewski, B.; Chen, T.F.; Delgado, A.G.; Westerhoff, P.; Rittmann, B. Using radish (*Raphanus lativus* L.) germination to establish a benchmark dose for the toxicity of ozonated-petroleum byproducts in soil. *Chemosphere* **2023**, *313*, 137382.
- Wang, S.; Cheng, F.L.; Shao, Z.G.; Wu, B.; Guo, S.H. Effects of thermal desorption on ecotoxicological characteristics of heavy petroleum-contaminated soil. *Sci. Total Environ.* **2023**, *857*, 159405.
- Domínguez, C.M.; Ventura, P.; Checa-Fernández, A.; Santos, A. Comprehensive study of acute toxicity using Microtox® bioassay in soils contaminated by lindane wastes. *Sci. Total Environ.* **2023**, *856*, 159146.
- Lin, L.; Zhu, B.J.; Qu, X.Z.; Gu, X.Y. Are Ni-Cd toxicity models derived from simple bioassay applicable to natural soils? A bioassay-MSMs coupling approach. *J. Hazard. Mater.* **2022**, *440*, 129830.
- Li, Y.Y.; Tian, X.Y.; Liang, J.L.; Chen, X.L.; Ye, J.Y.; Liu, Y.S.; Liu, Y.Y.; Wei, Y.M. Remediation of hexavalent chromium in contaminated soil using amorphous iron pyrite: Effect on leachability, bioaccessibility, phytotoxicity and long-term stability. *Environ. Pollut.* **2020**, *264*, 114804.
- Sivaram, A.K.; Logeshwaran, P.; Lockington, R.; Naidu, R.; Megharaj, M. Phytoremediation efficacy assessment of polycyclic aromatic hydrocarbons contaminated soils using garden pea (*Pisum sativum*) and earthworms (*Eisenia fetida*). *Chemosphere* **2019**, *229*, 227-235.
- Delerue, F.; Masfaraud, J.F.; Lascourrèges, J.F.; Atteia, O. A multi-site approach to investigate the role of toxicity and confounding factors on plant bioassay results. *Chemosphere* **2019**, *219*, 482-492.

11. Lors, C.; Ponge, J.F.; Aldaya, M.M.; Damidot, D. Comparison of solid and liquid-phase bioassays using ecoscores to assess contaminated soils. *Environ. Pollut.* **2011**, *159*, 2974–2981.
12. Santos, E.S.; Abreu, M.M.; de Varennes, A.; Macías, F.; Leitão, S.; Cerejeira, M.J. Evaluation of chemical parameters and ecotoxicity of a soil developed on gossan following application of polyacrylates and growth of *Spergularia purpurea*. *Sci. Total Environ.* **2013**, *461–462*, 360–370.
13. Leitgib, L.; Kálmán, J.; Gruiz, K. Comparison of bioassays by testing whole soil and their water extract from contaminated sites. *Chemosphere* **2007**, *66*, 428–434.
14. Kočí, V.; Mocová, K.; Kulovaná, M.; Vosáhllová, S. Phytotoxicity tests of solid wastes and contaminated soils in the Czech Republic. *Environ. Sci. Pollut. Res.* **2010**, *17*, 611–623.
15. Wong, J.W.C.; Li, K.; Fang, M.; Su, D.C. Toxicity evaluation of sewage sludges in Hong Kong. *Environ. Int.* **2001**, *27*, 373–380.
16. Yang, F.L.; Yun, Y.; Li, G.K.; Sang, N. Heavy metals in soil from gangue stacking areas increase children health risk and causes developmental neurotoxicity in zebrafish larvae. *Sci. Total Environ.* **2021**, *794*, 148629.
17. Yang, F.L.; Li, G.K.; Sang, N. Embryonic exposure to soil samples from a gangue stacking area induces thyroid hormone disruption in zebrafish. *Chemosphere* **2019**, *236*, 124337.
18. Legler, J.; van Velzen, M.; Ceniñ, P.H.; Houtman, C.J.; Lamoree, M.H.; Wegener, J.W. Effect-directed analysis of municipal landfill soil reveals novel developmental toxicants in the zebrafish *Danio rerio*. *Environ. Sci. Technol.* **2011**, *45*, 8552–8558.
19. Yun, Y.; Gao, R.; Yue, H.F.; Liu, X.F.; Li, G.K.; Sang, N. Polycyclic aromatic hydrocarbon (PAH)-containing soils from coal gangue stacking areas contribute to epithelial to mesenchymal transition (EMT) modulation on cancer cell metastasis. *Sci. Total Environ.* **2017**, *580*, 632–640.
20. Rodríguez-Ruiz, A.; Asensio, V.; Zaldibar, B.; Soto, M.; Marigómez, I. Toxicity assessment through multiple endpoint bioassays in soils posing environmental risk according to regulatory screening values. *Environ. Sci. Pollut. Res.* **2014**, *21*, 9689–9708.
